# Supplementary material for: Lot Sizing with Piecewise Concave Production Costs
Source: Atypon-hosted journal article supplement (doi:10.1287/ijoc.2014.0597), 2014-05-20
Supplement: ijoc.2014.0597-sm-piecewiseconcave_os.pdf [file ijoc.2014.0597-sm-piecewiseconcave_os.pdf]

# Online Supplement for “Lot Sizing with Piecewise Concave Production Costs”

Esra Koca, Hande Yaman and M. Selim Aktürk  
 Bilkent University, Department of Industrial Engineering,  
 Bilkent, 06800 Ankara, Turkey,  
 ekoca@bilkent.edu.tr, hyaman@bilkent.edu.tr, akturk@bilkent.edu.tr

## Valid Inequalities Used in the Computational Study

In this section, we briefly describe the valid inequalities developed by Sanjeevi and Kianfar (2012) for the multi-module lot-sizing problem.

Let  $k < l$  be two periods and  $S \subseteq \{k, \dots, l\}$ . For each  $i \in S$ , define  $S_i = S \cap \{k, \dots, i\}$  and compute

$$n_i = \begin{cases} \min\{t : t \in S \setminus S_i\} & \text{if } S \setminus S_i \neq \emptyset, \\ l + 1 & \text{if } S \setminus S_i = \emptyset. \end{cases}$$

Adding up the inventory balance equations in the formulation MC from  $t = k$  to  $t = n_i - 1$ , we obtain

$$s_{k-1} + \sum_{t=k}^{n_i-1} \sum_{j=1}^m x_t^j = d_{k,n_i-1} + s_{n_i-1}.$$

As  $s_{n_i-1} \geq 0$  and  $x_t^j \leq b^j y_t^j$ , we have

$$s_{k-1} + \sum_{t \in \{k, \dots, n_i-1\} \setminus S_i} \sum_{j=1}^m x_t^j + \sum_{j=1}^m \sum_{t \in S_i} b^j y_t^j \geq d_{k,n_i-1}.$$

Now, let  $I \subseteq S$ . Then  $s_{k-1} + \sum_{t \in \{k, \dots, n_{|I|-1}\} \setminus S} \sum_{j=1}^m x_t^j \geq s_{k-1} + \sum_{t \in \{k, \dots, n_i-1\} \setminus S_i} \sum_{j=1}^m x_t^j$  for all  $i \in I$ . By letting  $z_i^j = \sum_{t \in S_i} y_t^j$ , one obtains the relaxation

$$s_{k-1} + \sum_{t \in \{k, \dots, n_{|I|-1}\} \setminus S} \sum_{j=1}^m x_t^j + \sum_{j=1}^m b^j z_i^j \geq d_{k,n_i-1} \quad i \in I.$$

Note that  $s_{k-1} + \sum_{t \in \{k, \dots, n_{|I|-1}\} \setminus S} \sum_{j=1}^m x_t^j \in \mathbb{R}_+$  and  $z_i^j \in \mathbb{Z}_+$  for all  $i \in I$  and  $j = 1, \dots, m$ . Sanjeevi and Kianfar (2012) generate mixed  $n$ -step MIR inequalities based on this relaxation when the coefficients satisfy some conditions. Like Sanjeevi and Kianfar (2012), we consider all possible pairs  $k$  and  $l$ . We let  $S = \{k, \dots, l\}$ ,  $S = \{t \in \{k, \dots, l\} : \bar{y}_t^j > 0 \text{ for some } j \in$

$\{1, \dots, m\}$  and  $S = \{t \in \{k, \dots, l\} : \bar{y}_t^j < 1 \text{ for some } j \in \{1, \dots, m\}\}$  where  $(\bar{x}, \bar{y}, \bar{s})$  is the LP optimum. For these choices of  $S$ , we consider all possible two-element subsets  $I$ , i.e.,  $|I| = 2$ , and add the resulting inequality if it is violated. We apply this cutting phase at the root node. Then we drop the inactive cuts and give the strengthened formulation to the solver.

## Results of the Computational Study

In this section, we provide the detailed results of our computational study in Tables 1-3.

Table 1: Results for  $n = 40$  and  $m = 2$ 

| instance     |              |              | MC      |       |      | MC-CUTS |       |                | DP      |        |
|--------------|--------------|--------------|---------|-------|------|---------|-------|----------------|---------|--------|
| $(f^1, f^2)$ | $(c^1, c^2)$ | $(b^1, b^2)$ | BUB     | LPGap | FGap | BUB     | LPGap | FGap<br>(Time) | OPT     | Time   |
| 1            | 1            | 1            | 69644.6 | 2.61  | 1.60 | 69737.1 | 1.37  | 1.22           | 69620.3 | 159.68 |
|              |              | 2            | 63556.1 | 5.05  | 3.96 | 63779.3 | 3.64  | 3.63           | 63474.5 | 161.31 |
|              |              | 3            | 57745.4 | 5.91  | 4.35 | 57888.0 | 4.02  | 3.90           | 57651.9 | 152.53 |
|              | 2            | 1            | 78676.3 | 2.31  | 1.29 | 78762.6 | 1.15  | 0.61           | 78660.8 | 162.50 |
|              |              | 2            | 72588.6 | 4.42  | 3.30 | 73285.9 | 3.10  | 1.92           | 72515.0 | 158.43 |
|              |              | 3            | 66835.4 | 5.11  | 3.72 | 66801.9 | 3.44  | 1.33           | 66692.4 | 158.39 |
|              | 3            | 1            | 79678.2 | 3.51  | 1.29 | 79707.4 | 1.51  | 0.76           | 79642.0 | 161.67 |
|              |              | 2            | 73610   | 5.71  | 3.22 | 73604.6 | 3.00  | 2.38           | 73504.9 | 150.65 |
|              |              | 3            | 67908.3 | 6.79  | 3.47 | 67967.6 | 3.54  | 2.64           | 67890.7 | 146.49 |
|              | 4            | 1            | 87701.3 | 2.07  | 1.24 | 87781.3 | 1.09  | 0.53           | 87701.3 | 162.23 |
|              |              | 2            | 81676.2 | 3.93  | 3.13 | 81786.8 | 2.83  | 2.72           | 81555.5 | 154.98 |
|              |              | 3            | 75872.8 | 4.50  | 3.37 | 75797.0 | 3.06  | 2.76           | 75732.9 | 147.92 |
| 2            | 1            | 1            | 48332.1 | 6.34  | 2.79 | 48260.3 | 1.29  | (35)           | 48260.3 | 161.80 |
|              |              | 2            | 44261.8 | 9.22  | 4.67 | 44280.0 | 2.43  | 0.73           | 44261.8 | 152.92 |
|              |              | 3            | 40523.5 | 10.74 | 5.06 | 40519.3 | 2.97  | 0.81           | 40514.8 | 146.48 |
|              | 2            | 1            | 65963   | 4.03  | 1.31 | 65941.3 | 1.19  | (315)          | 65941.3 | 161.30 |
|              |              | 2            | 61905.3 | 5.87  | 2.64 | 61924.1 | 2.35  | 1.41           | 61892.8 | 151.16 |
|              |              | 3            | 58118.9 | 6.64  | 2.72 | 58142.0 | 2.84  | 1.58           | 58098.0 | 144.96 |
|              | 3            | 1            | 57755   | 5.90  | 2.93 | 57642.0 | 0.78  | (4)            | 57642.0 | 161.41 |
|              |              | 2            | 53595.3 | 8.01  | 4.27 | 53504.9 | 1.17  | (3)            | 53504.9 | 153.65 |
|              |              | 3            | 49913.7 | 9.40  | 4.70 | 49890.7 | 1.48  | (6)            | 49890.7 | 149.81 |
|              | 4            | 1            | 66363.1 | 4.61  | 1.91 | 66341.3 | 0.94  | (13)           | 66341.3 | 161.61 |
|              |              | 2            | 62360.1 | 6.55  | 3.36 | 62346.6 | 1.73  | 0.43           | 62342.8 | 153.27 |
|              |              | 3            | 58616.1 | 7.43  | 3.53 | 58609.3 | 2.06  | 0.53           | 58595.8 | 146.49 |
| 3            | 1            | 1            | 69620.3 | 2.61  | 1.45 | 69620.3 | 1.30  | (1)            | 69620.3 | 160.77 |
|              |              | 2            | 63491.7 | 5.05  | 3.61 | 63552.7 | 3.50  | 2.58           | 63474.5 | 150.25 |
|              |              | 3            | 57730.1 | 5.91  | 4.21 | 57810.7 | 3.98  | 3.42           | 57651.9 | 147.68 |
|              | 2            | 1            | 78660.8 | 2.31  | 1.22 | 78660.8 | 1.15  | (1)            | 78660.8 | 158.88 |
|              |              | 2            | 72566.5 | 4.42  | 3.29 | 72626.0 | 3.06  | 2.50           | 72515.0 | 150.50 |
|              |              | 3            | 66721.5 | 5.11  | 3.57 | 66700.1 | 3.44  | 2.74           | 66692.4 | 145.53 |
|              | 3            | 1            | 87701.3 | 2.07  | 1.12 | 87701.3 | 1.03  | (1)            | 87701.3 | 160.51 |
|              |              | 2            | 81618.3 | 3.93  | 2.93 | 82461.0 | 2.78  | 2.64           | 81555.5 | 151.99 |
|              |              | 3            | 75816.5 | 4.50  | 3.24 | 76412.7 | 3.04  | 2.56           | 75732.9 | 144.93 |
|              | 4            | 1            | 87722.5 | 2.07  | 1.18 | 87848.6 | 1.03  | 0.51           | 87701.3 | 161.59 |
|              |              | 2            | 81572.7 | 3.93  | 2.78 | 81679.4 | 2.72  | 2.30           | 81555.5 | 150.58 |
|              |              | 3            | 75831.3 | 4.50  | 3.25 | 75827.0 | 3.03  | 2.50           | 75732.9 | 145.36 |

Table 2: Results for  $n = 20$  and  $m = 3$ 

| instance          |                   |                   | MC      |       |                | MC-CUTS |       |                | DP      |       |
|-------------------|-------------------|-------------------|---------|-------|----------------|---------|-------|----------------|---------|-------|
| $(f^1, f^2, f^3)$ | $(c^1, c^2, c^3)$ | $(b^1, b^2, b^3)$ | BUB     | LPGap | FGap<br>(Time) | BUB     | LPGap | FGap<br>(Time) | OPT     | Time  |
| 1                 | 1                 | 1                 | 69160.1 | 3.85  | 3.40           | 69160.2 | 3.81  | 3.42           | 69159.7 | 172.7 |
|                   |                   | 2                 | 57167   | 3.01  | 2.37           | 57164.1 | 2.99  | 2.40           | 57137   | 149.5 |
|                   | 2                 | 1                 | 84084.2 | 3.26  | 2.35           | 84084.2 | 3.12  | 2.37           | 84084.2 | 173.8 |
|                   |                   | 2                 | 71544.9 | 2.41  | 0.94           | 71544.9 | 2.39  | 0.86           | 71544.9 | 150.3 |
|                   | 3                 | 1                 | 84216.4 | 3.55  | 2.26           | 84216.4 | 3.18  | 2.27           | 84216.3 | 171.8 |
|                   |                   | 2                 | 71544.9 | 2.41  | 0.42           | 71544.9 | 2.39  | 0.46           | 71544.9 | 150.7 |
|                   | 4                 | 1                 | 83842.1 | 3.50  | 2.62           | 83866.6 | 3.37  | 2.65           | 83836.2 | 171.4 |
|                   |                   | 2                 | 71902.8 | 2.89  | 1.62           | 71929.0 | 2.75  | 1.65           | 71902.8 | 150.7 |
|                   | 5                 | 1                 | 84107.3 | 3.81  | 2.57           | 84132.8 | 3.02  | 2.49           | 84107.2 | 171.1 |
|                   |                   | 2                 | 72194.2 | 3.28  | 1.47           | 72194.2 | 2.66  | 1.46           | 72194.1 | 150.8 |
|                   | 6                 | 1                 | 83913.8 | 3.57  | 2.56           | 83908.3 | 3.44  | 2.53           | 83901.2 | 176.8 |
|                   |                   | 2                 | 72017.5 | 3.05  | 1.52           | 72017.5 | 2.90  | 1.56           | 72017.5 | 155.4 |
|                   | 7                 | 1                 | 84153.1 | 3.86  | 2.45           | 84152.0 | 3.01  | 2.38           | 84151.9 | 172.5 |
|                   |                   | 2                 | 72307.4 | 3.44  | 1.31           | 72307.4 | 2.54  | 1.15           | 72307.4 | 154.4 |
| 2                 | 1                 | 1                 | 51062.9 | 5.95  | 2.64           | 51063.6 | 2.87  | 1.38           | 51062.9 | 174.5 |
|                   |                   | 2                 | 42680.2 | 6.23  | (181.7)        | 42680.2 | 3.00  | (33)           | 42680.2 | 153.5 |
|                   | 2                 | 1                 | 70712.2 | 3.87  | 1.85           | 70712.3 | 2.42  | 1.57           | 70712.2 | 172.4 |
|                   |                   | 2                 | 62329.6 | 3.78  | 0.84           | 62329.6 | 2.36  | 0.57           | 62329.6 | 151.3 |
|                   | 3                 | 1                 | 67942.4 | 4.84  | 1.93           | 67942.4 | 1.72  | (993)          | 67942.4 | 173.1 |
|                   |                   | 2                 | 59184.7 | 4.29  | (27.8)         | 59184.7 | 2.21  | (6)            | 59184.7 | 151.6 |
|                   | 4                 | 1                 | 70527.8 | 3.60  | 1.95           | 70512.2 | 2.67  | 1.89           | 70512.2 | 173.8 |
|                   |                   | 2                 | 61893.9 | 3.11  | 1.13           | 61899.6 | 2.59  | 1.18           | 61893.9 | 151.2 |
|                   | 5                 | 1                 | 65874.8 | 5.21  | 1.91           | 65865.5 | 1.43  | (42)           | 65865.5 | 171.9 |
|                   |                   | 1                 | 57194.1 | 4.83  | (19.8)         | 57194.1 | 2.16  | (3)            | 57194.1 | 152.7 |
|                   | 6                 | 1                 | 67488.1 | 4.20  | 1.72           | 67488.1 | 2.42  | 1.25           | 67487.3 | 172.6 |
|                   |                   | 2                 | 59282.2 | 4.45  | (984.1)        | 59282.2 | 2.36  | (350)          | 59282.1 | 152.2 |
|                   | 7                 | 1                 | 65653.1 | 4.90  | 1.37           | 65652   | 1.95  | 0.33           | 65651.9 | 172.7 |
|                   |                   | 2                 | 57307.4 | 5.02  | (116.4)        | 57307.4 | 1.95  | (3)            | 57307.4 | 155.4 |
| 3                 | 1                 | 1                 | 39063.6 | 5.43  | 2.22           | 39062.9 | 3.75  | 2.09           | 39062.9 | 174.4 |
|                   |                   | 2                 | 32633.1 | 5.66  | (718.2)        | 32633.1 | 3.89  | (410)          | 32633.1 | 149.8 |
|                   | 2                 | 1                 | 57392.8 | 3.45  | 1.80           | 57394.5 | 3.26  | 1.70           | 57392.8 | 173.2 |
|                   |                   | 2                 | 50557.0 | 3.18  | (382.2)        | 50557.0 | 2.97  | (624)          | 50557.0 | 153.1 |
|                   | 3                 | 1                 | 55942.4 | 4.24  | 0.76           | 55942.5 | 2.09  | 0.53           | 55942.4 | 171.9 |
|                   |                   | 2                 | 49926.6 | 5.04  | (126.8)        | 49926.6 | 2.05  | (14)           | 49926.6 | 154.3 |
|                   | 4                 | 1                 | 55409.6 | 3.99  | 1.88           | 55409.6 | 3.80  | 1.70           | 55409.6 | 172.3 |
|                   |                   | 2                 | 48651.2 | 3.94  | (311.2)        | 48651.2 | 3.73  | (360)          | 48651.2 | 151.3 |
|                   | 5                 | 1                 | 53865.5 | 4.67  | (515.5)        | 53865.5 | 1.75  | (40)           | 53865.5 | 172.0 |
|                   |                   | 2                 | 48132.8 | 6.11  | (144.5)        | 48132.8 | 1.84  | (3)            | 48132.8 | 151.4 |
|                   | 6                 | 1                 | 55050.8 | 3.36  | 1.96           | 55064.1 | 3.17  | 1.99           | 55050.8 | 174.8 |
|                   |                   | 2                 | 48190.1 | 3.01  | 0.50           | 48181.7 | 2.79  | 0.41           | 48181.6 | 150.1 |
|                   | 7                 | 1                 | 53652.0 | 4.29  | 1.09           | 53652.0 | 2.38  | 0.78           | 53652.0 | 171.6 |
|                   |                   | 2                 | 47492.5 | 4.84  | (95.4)         | 47492.5 | 2.34  | (9)            | 47492.5 | 151.3 |

Table 3: Results for  $n = 15$  and  $m = 4$ 

| instance |     |     | MC      |       |                | MC-CUTS |       |                | DP      |       |
|----------|-----|-----|---------|-------|----------------|---------|-------|----------------|---------|-------|
| $f$      | $c$ | $b$ | BUB     | LPGap | FGap<br>(Time) | BUB     | LPGap | FGap<br>(Time) | OPT     | Time  |
| 1        | 1   | 1   | 52206.9 | 5.41  | 3.84           | 52206.9 | 5.16  | 3.80           | 52206.9 | 438.5 |
|          |     | 2   | 40213.2 | 5.47  | 3.02           | 40213.2 | 5.43  | 2.97           | 40213.2 | 411.2 |
|          |     | 3   | 34224.8 | 8.77  | 5.06           | 34224.8 | 8.20  | (733.5)        | 34224.8 | 406.6 |
|          | 2   | 1   | 52242.4 | 5.58  | 4.42           | 52242.4 | 5.42  | 4.34           | 52242.4 | 441.7 |
|          |     | 2   | 40404.6 | 5.92  | 3.51           | 40404.6 | 5.71  | 2.89           | 40404.6 | 406.9 |
|          |     | 3   | 34412.3 | 9.26  | 5.53           | 34412.3 | 8.41  | 4.20           | 34412.3 | 401.3 |
|          | 3   | 1   | 52242.4 | 5.58  | 4.15           | 52242.4 | 5.42  | 3.97           | 52242.4 | 440.2 |
|          |     | 2   | 40404.6 | 5.92  | 2.50           | 40404.6 | 5.71  | 2.05           | 40404.6 | 409.2 |
|          |     | 3   | 34412.3 | 9.26  | 3.79           | 34412.3 | 8.41  | (802.3)        | 34412.3 | 401.8 |
|          | 4   | 1   | 52242.4 | 5.58  | 3.92           | 52242.4 | 5.42  | 3.75           | 52242.4 | 439.7 |
|          |     | 2   | 40404.6 | 5.92  | 0.73           | 40404.6 | 5.71  | (706.6)        | 40404.6 | 416.6 |
|          |     | 3   | 34412.3 | 9.26  | (654.6)        | 34412.3 | 8.41  | (164.7)        | 34412.3 | 400.3 |
| 2        | 1   | 1   | 49312.8 | 5.63  | 3.93           | 49320   | 5.13  | 3.88           | 49312.8 | 446.4 |
|          |     | 2   | 38762.2 | 5.73  | 3.28           | 38762.2 | 5.51  | 3.03           | 38762.2 | 410.9 |
|          |     | 3   | 33269.9 | 8.87  | 5.60           | 33269.9 | 7.99  | 5.02           | 33269.9 | 408.2 |
|          | 2   | 1   | 47276.4 | 5.87  | 2.91           | 47276.4 | 5.01  | 2.79           | 47276.4 | 443.1 |
|          |     | 2   | 37321   | 6.03  | 1.03           | 37321   | 5.61  | (641.1)        | 37321.0 | 409.7 |
|          |     | 3   | 31912.3 | 9.24  | (867.6)        | 31912.3 | 8.33  | (230)          | 31912.3 | 406.0 |
|          | 3   | 1   | 48242.4 | 5.57  | 4.37           | 48242.4 | 5.40  | 4.27           | 48242.4 | 442.1 |
|          |     | 2   | 37404.6 | 5.94  | 1.38           | 37404.6 | 5.71  | (464.7)        | 37404.6 | 412.3 |
|          |     | 3   | 31912.3 | 9.24  | (777.6)        | 31912.3 | 8.32  | (142.7)        | 31912.3 | 411.1 |
|          | 4   | 1   | 47276.4 | 5.87  | 3.26           | 47276.4 | 5.01  | 3.13           | 47276.4 | 441.7 |
|          |     | 2   | 37321   | 6.03  | (786.4)        | 37321   | 5.61  | (214.1)        | 37321.0 | 438.7 |
|          |     | 3   | 31912.3 | 9.24  | (236.9)        | 31912.3 | 8.33  | (53.6)         | 31912.3 | 408.2 |

## References

- Sanjeevi, S., K. Kianfar. 2012. Mixed n-step MIR inequalities: Facets for the n-mixing set. *Discrete Optim.* **9** 216 –235.
